# Supplementary material for: Construction of logic gates with the fluorene-based small molecule/DNA probes
Source: Royal Society of Chemistry journal article supplement (doi:10.1039/c2mb25129a), 2012-05-24
Supplement: c2mb25129a.pdf [file c2mb25129a.pdf]

## Electronic Supplementary Information

### Construction of Logic Gates with the Fluorene-Based Small Molecule/DNA Probes

Jing Guo, Ting Wang and Renqiang Yang <sup>\*a</sup>

<sup>a</sup> Qingdao Institute of Bioenergy and Bioprocess Technology, Chinese Academy of Sciences, 189

Songling Rd., Qingdao 266101, China.

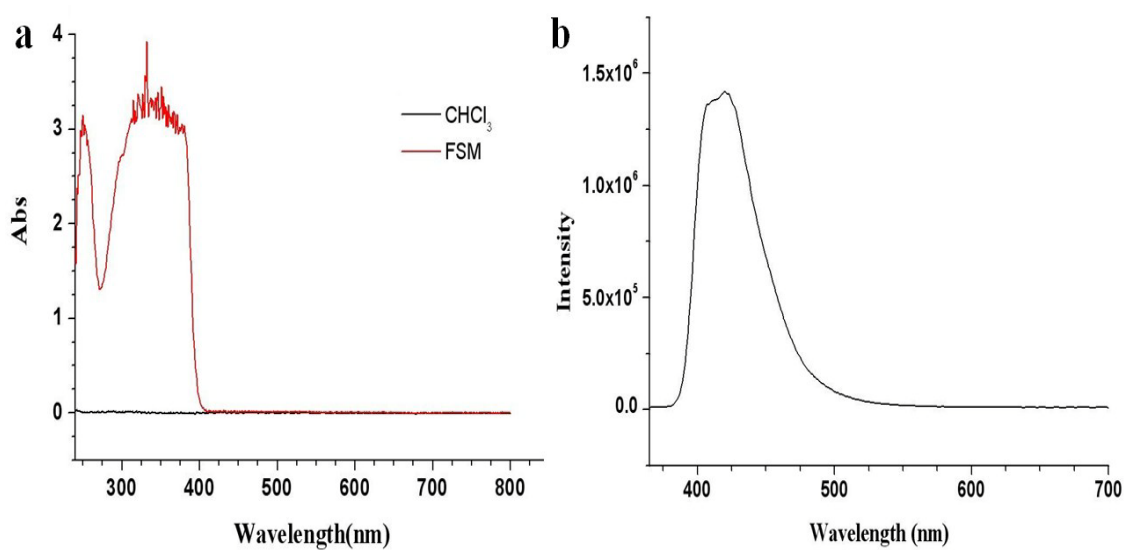

**Fig. S1** UV-vis absorption spectra (a) and fluorescent spectra (b) of FSM

The UV-vis spectra and fluorescent spectra of the fluorene-based small molecule (FSM) were solely measured. The maximum absorption wavelength of FSM was 332 nm and the maximum emission wavelength was 420 nm.

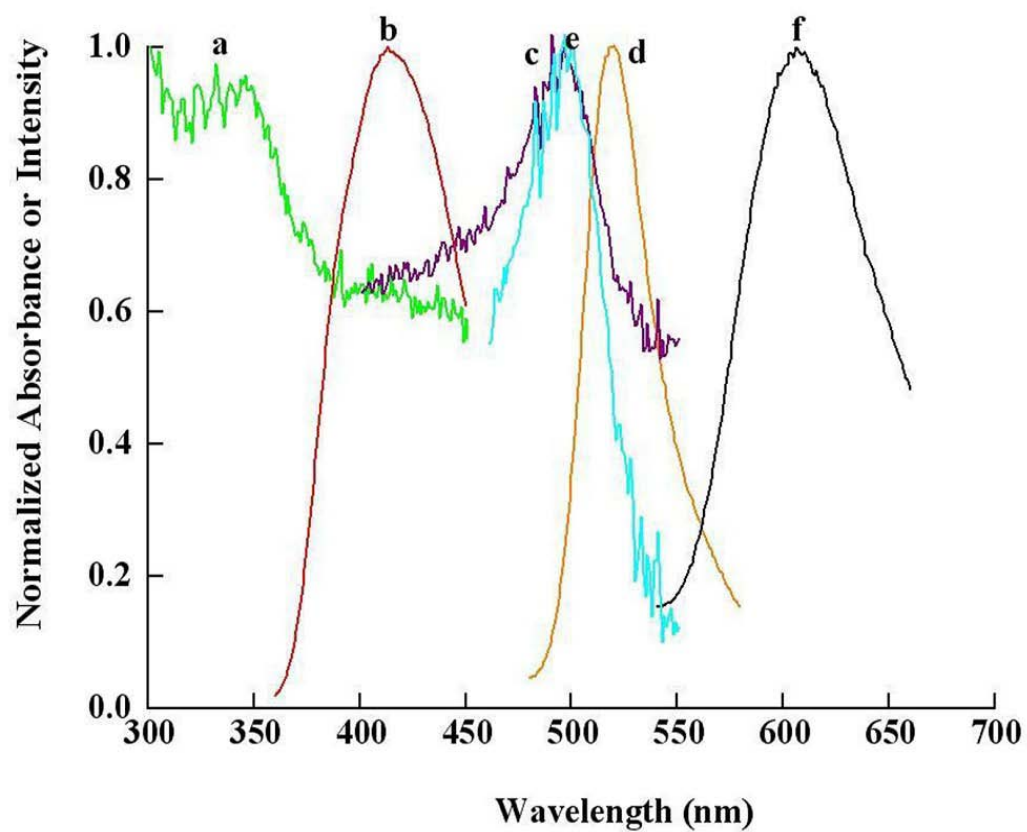

**Fig. S2** UV-vis absorption spectra and fluorescence spectra of FSM/DNA probe (a and b), 5'-FITC-ssDNA (c and d), and EB/dsDNA (e and f).

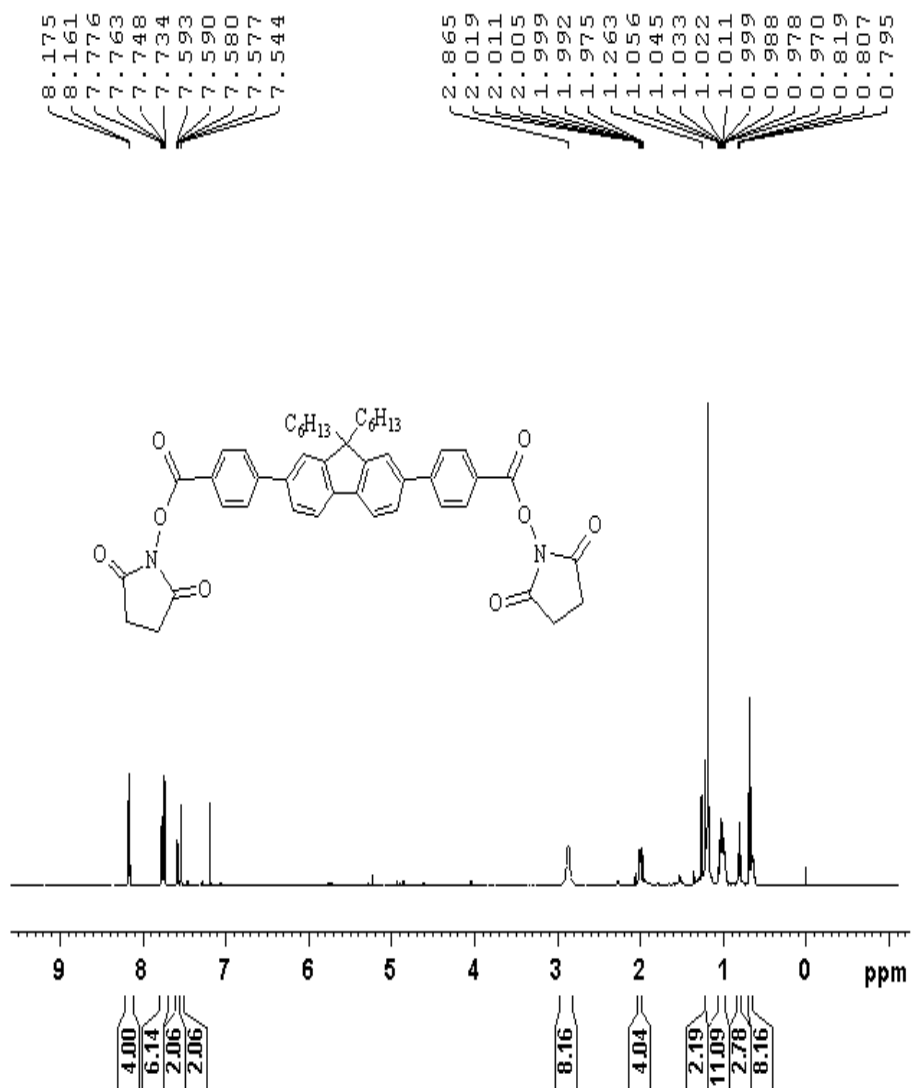

**Fig. S3**  $^1H$ -NMR spectra of the FSM
